# Supplementary material
Source: PubMed Central journal article supplement (PMC5790399)

Fig 1. Effects of CXCL11 transduction into Human CAR T cells

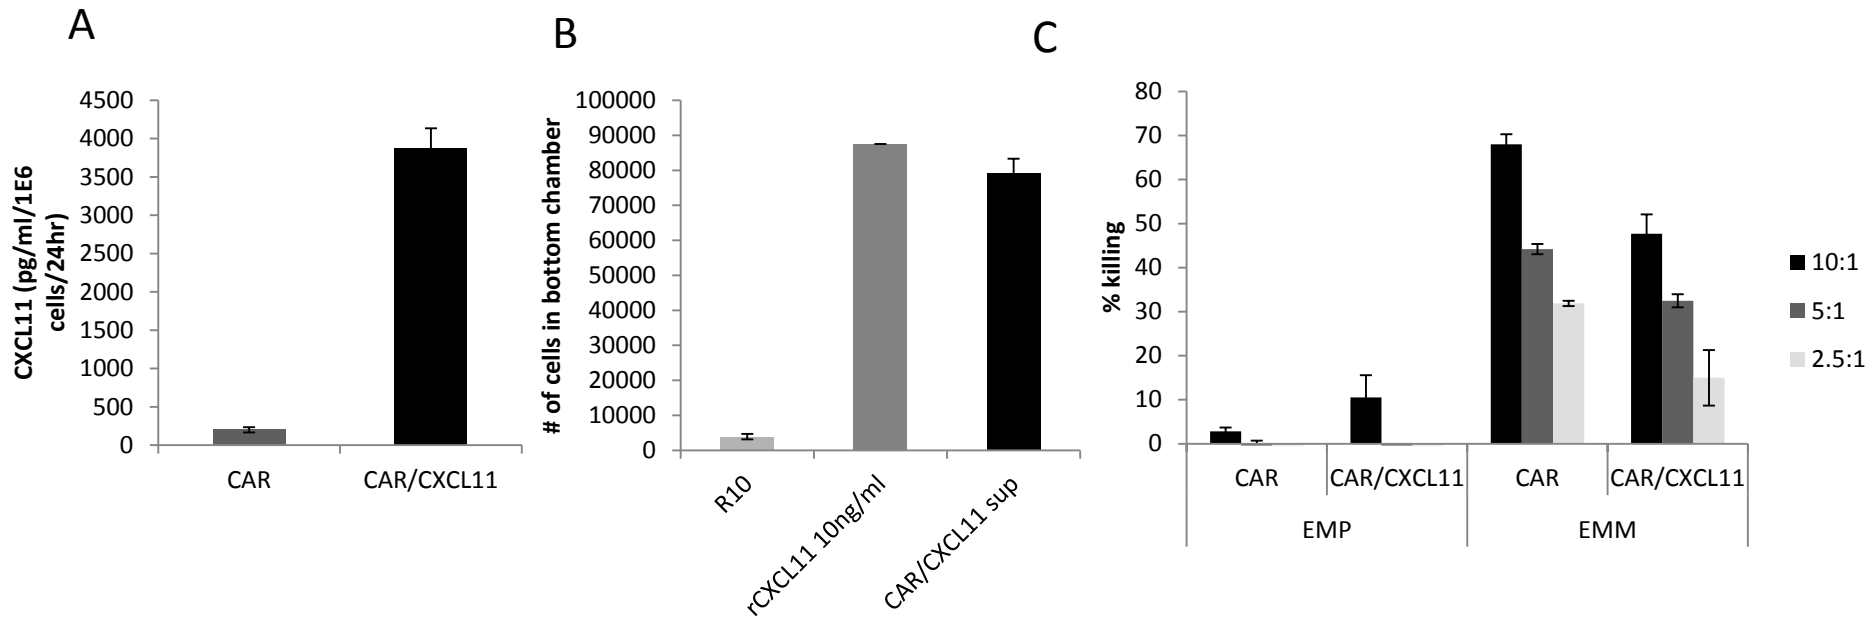

Figure 2

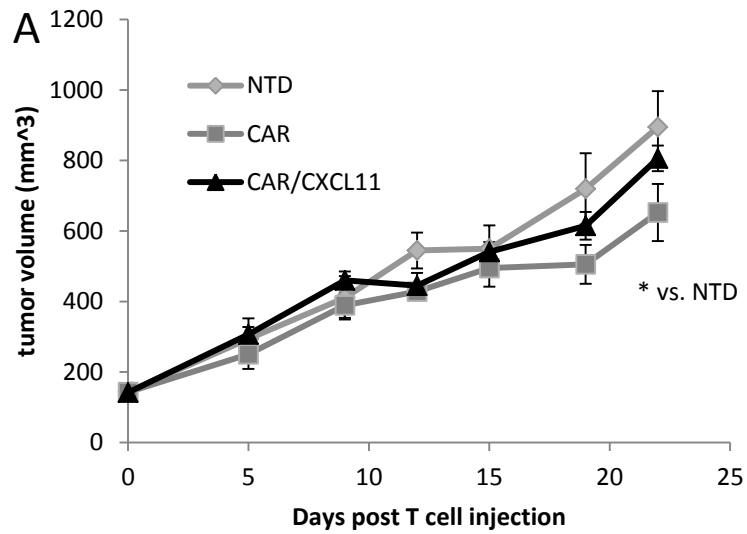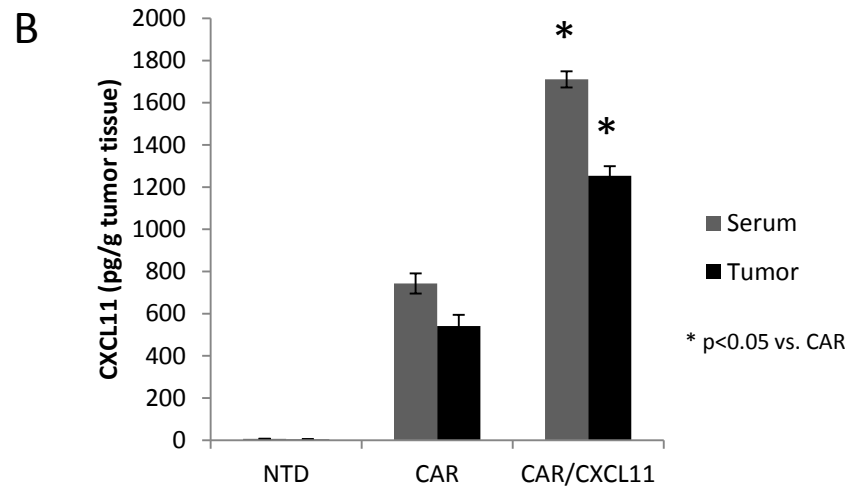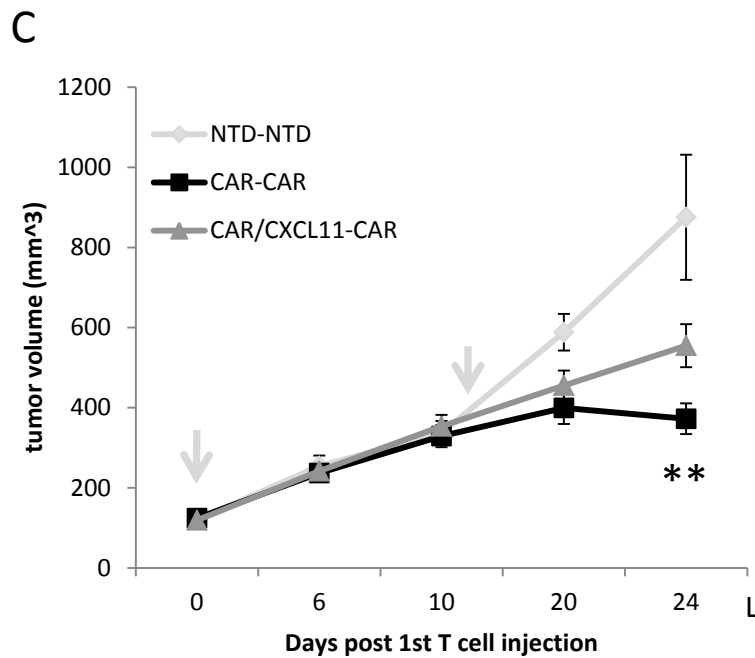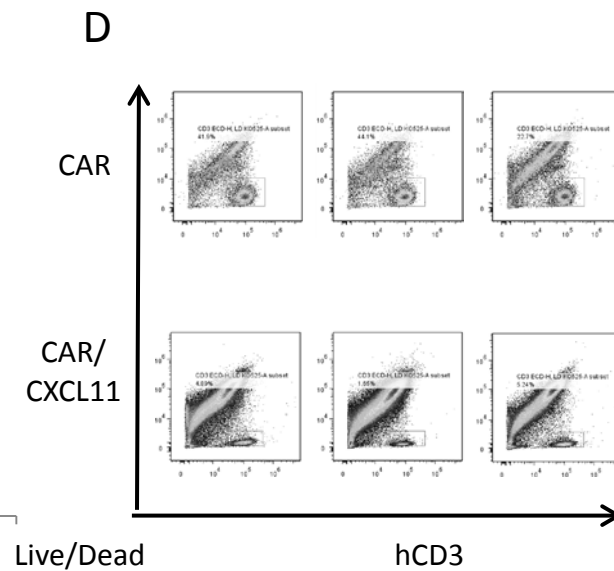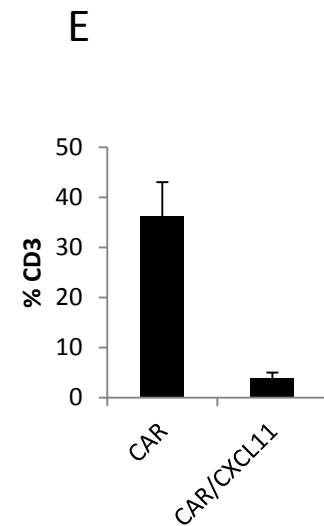

**Figure 3**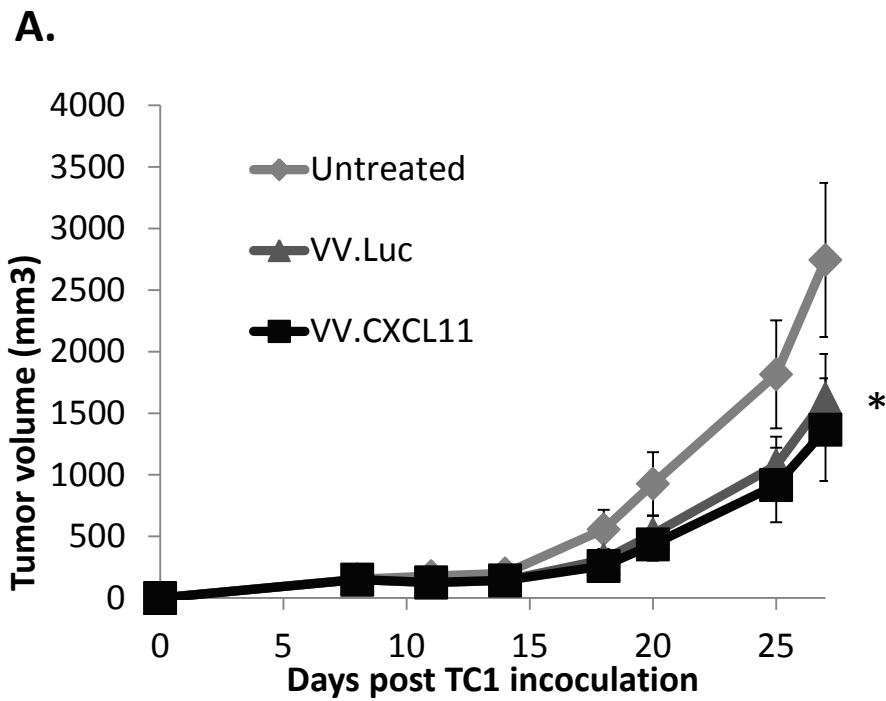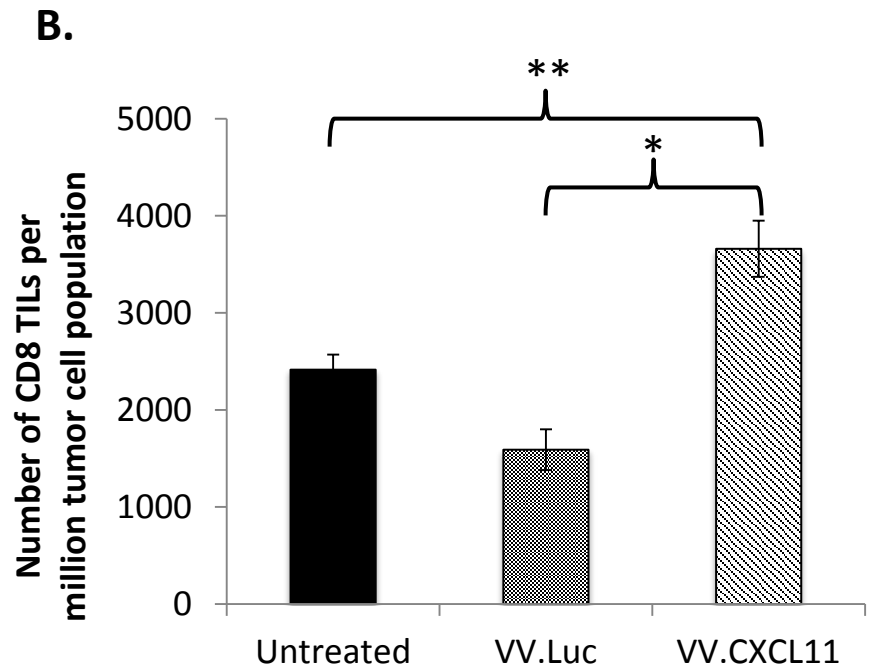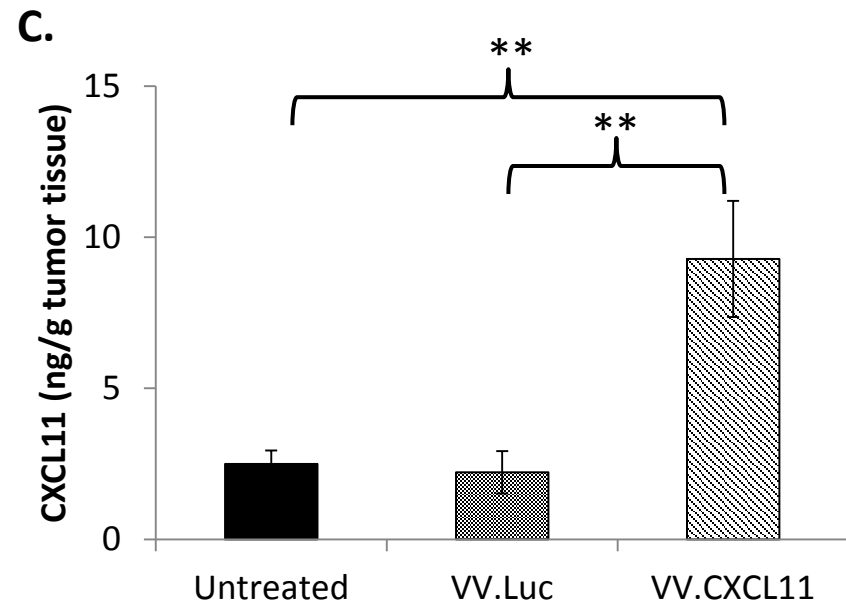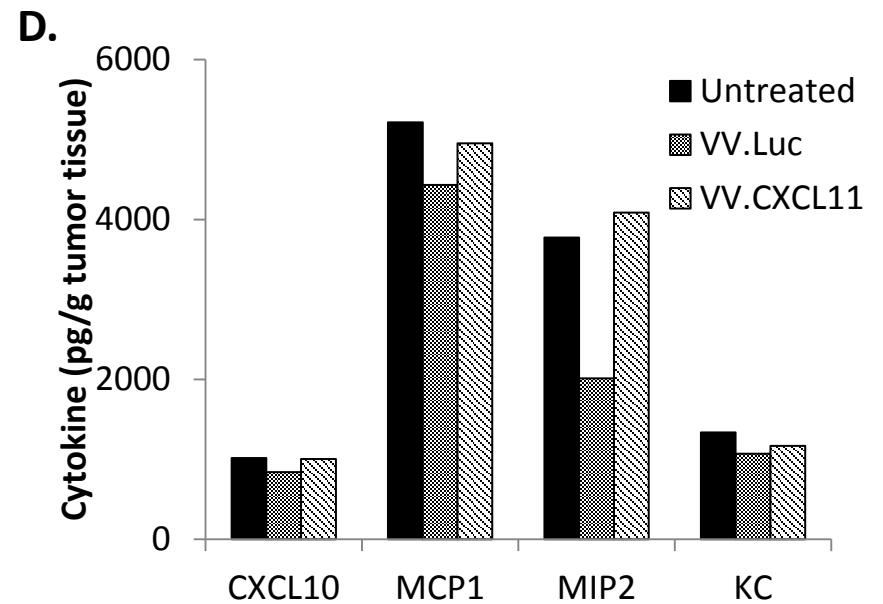

Figure 4

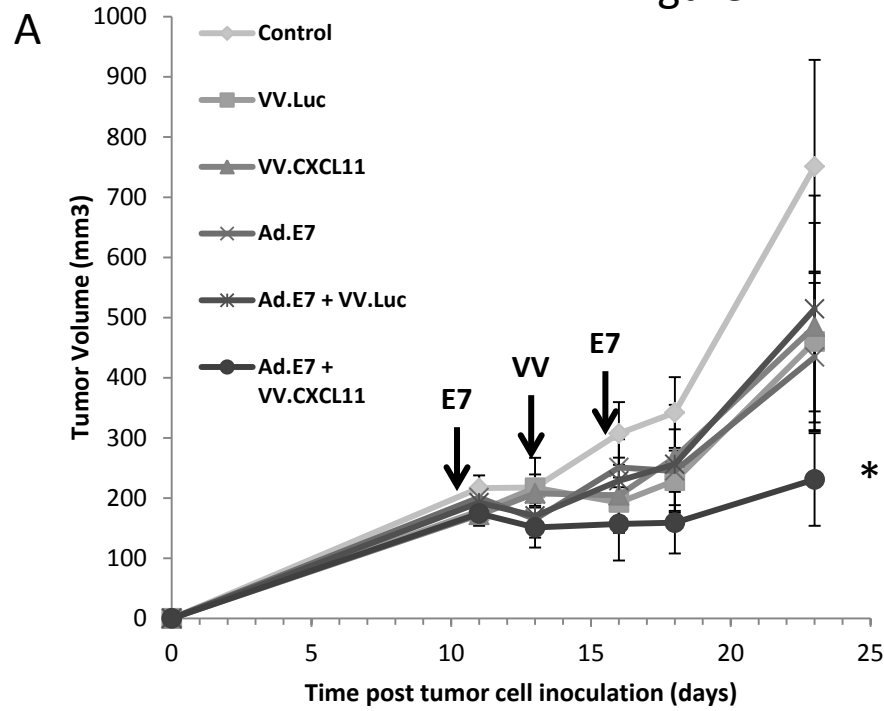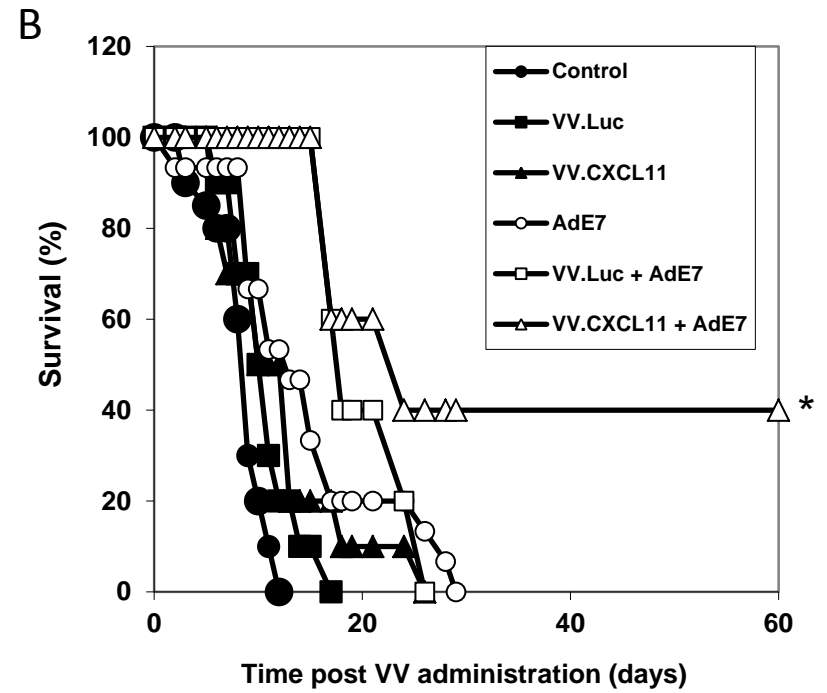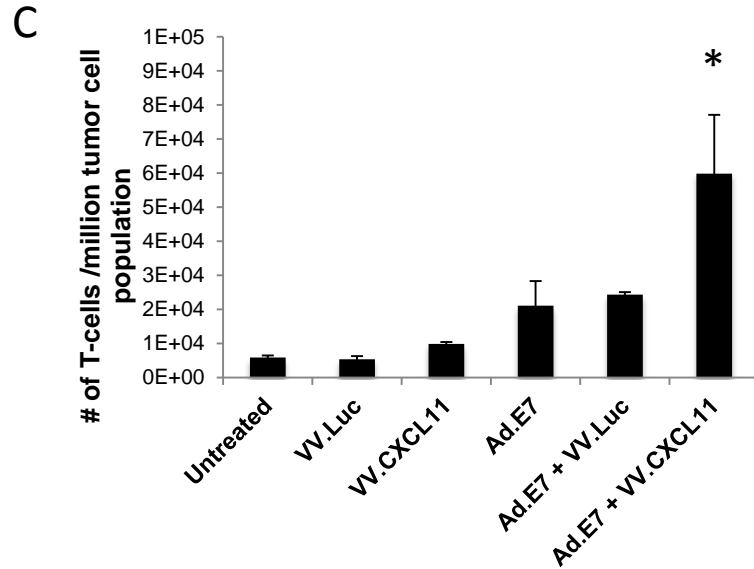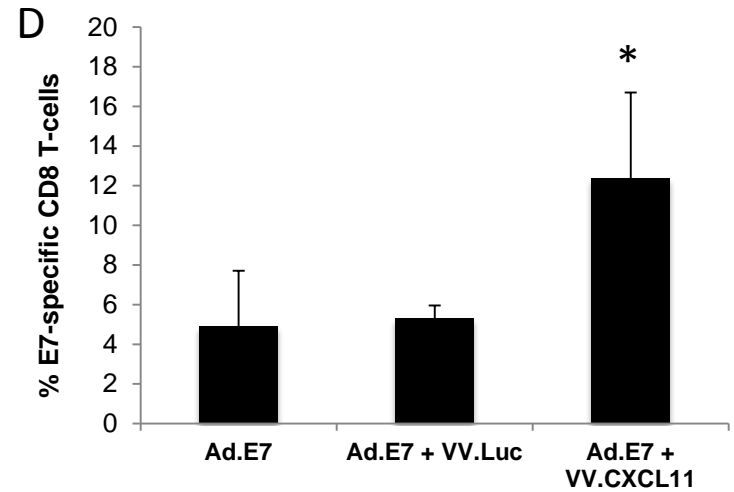

Fig. 5

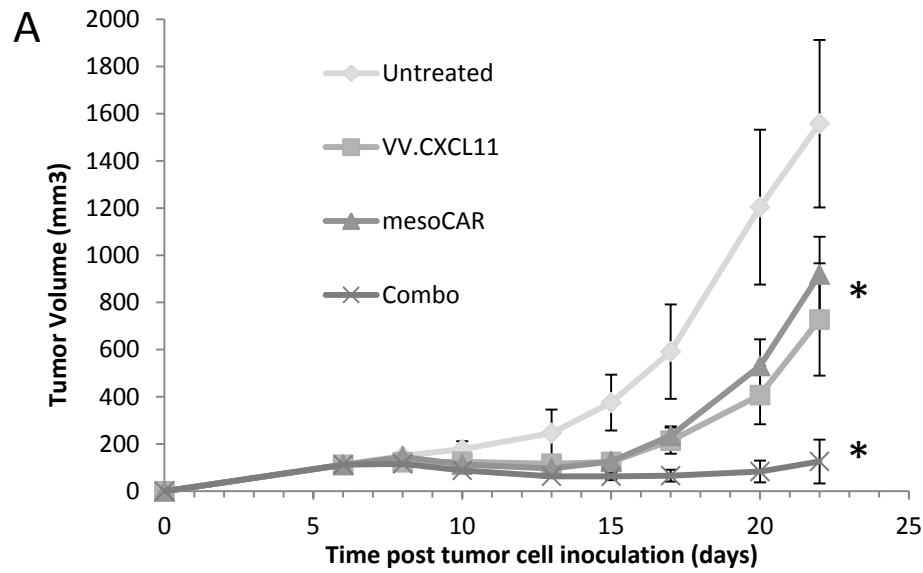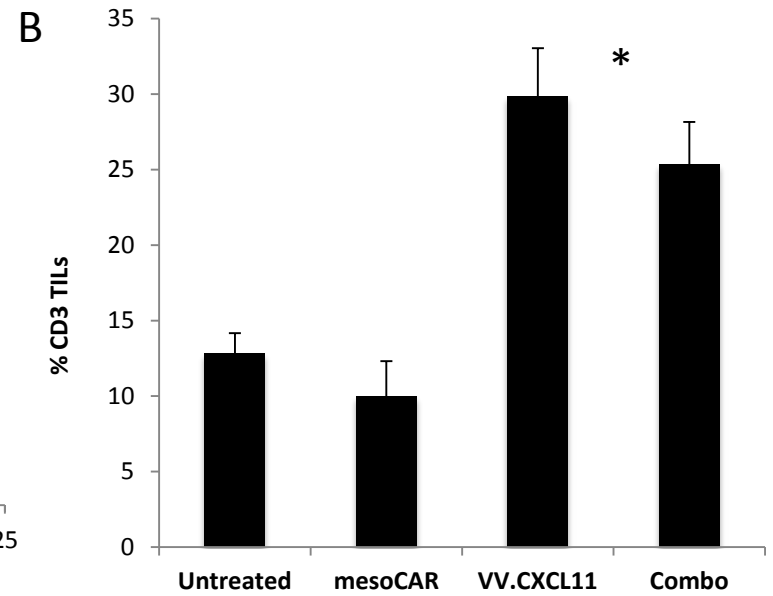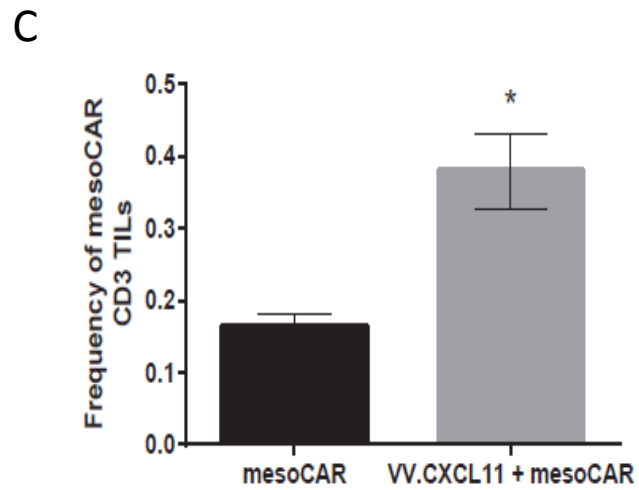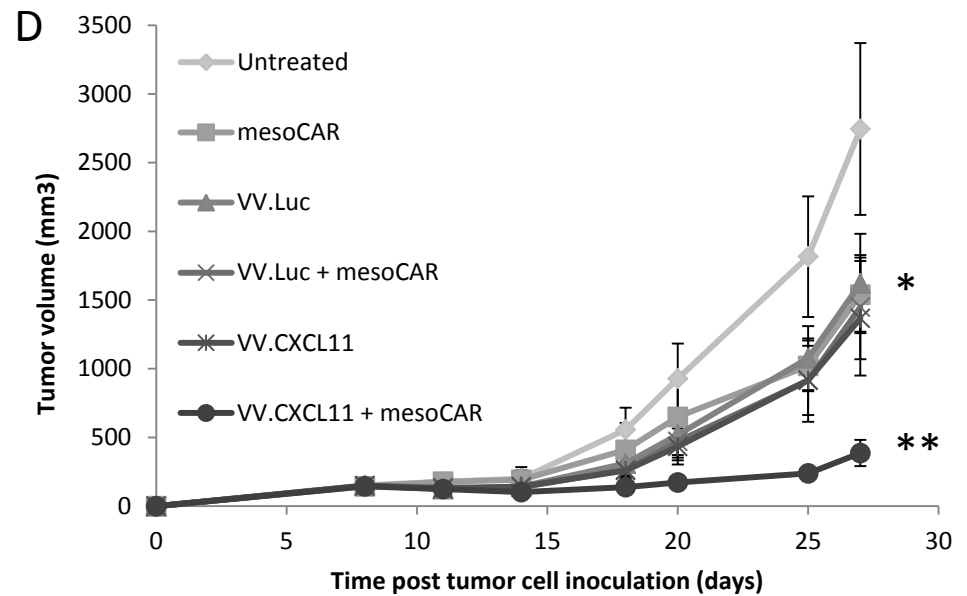

**Suppl Fig 1.** Diagram of our lentiviral expression plasmid encoding for SS1BBz and CXCL11

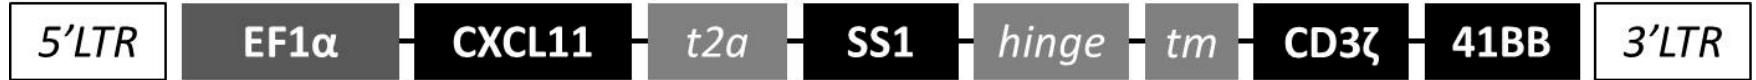

tm = transmembrane

# Supplemental Fig 2.

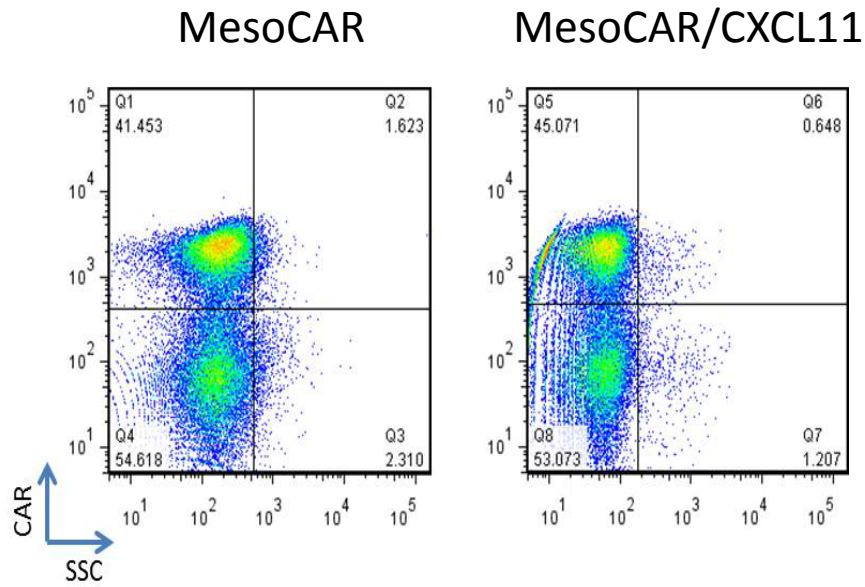

# Suppl. Figure 3 -% human T cells in SPLEENS

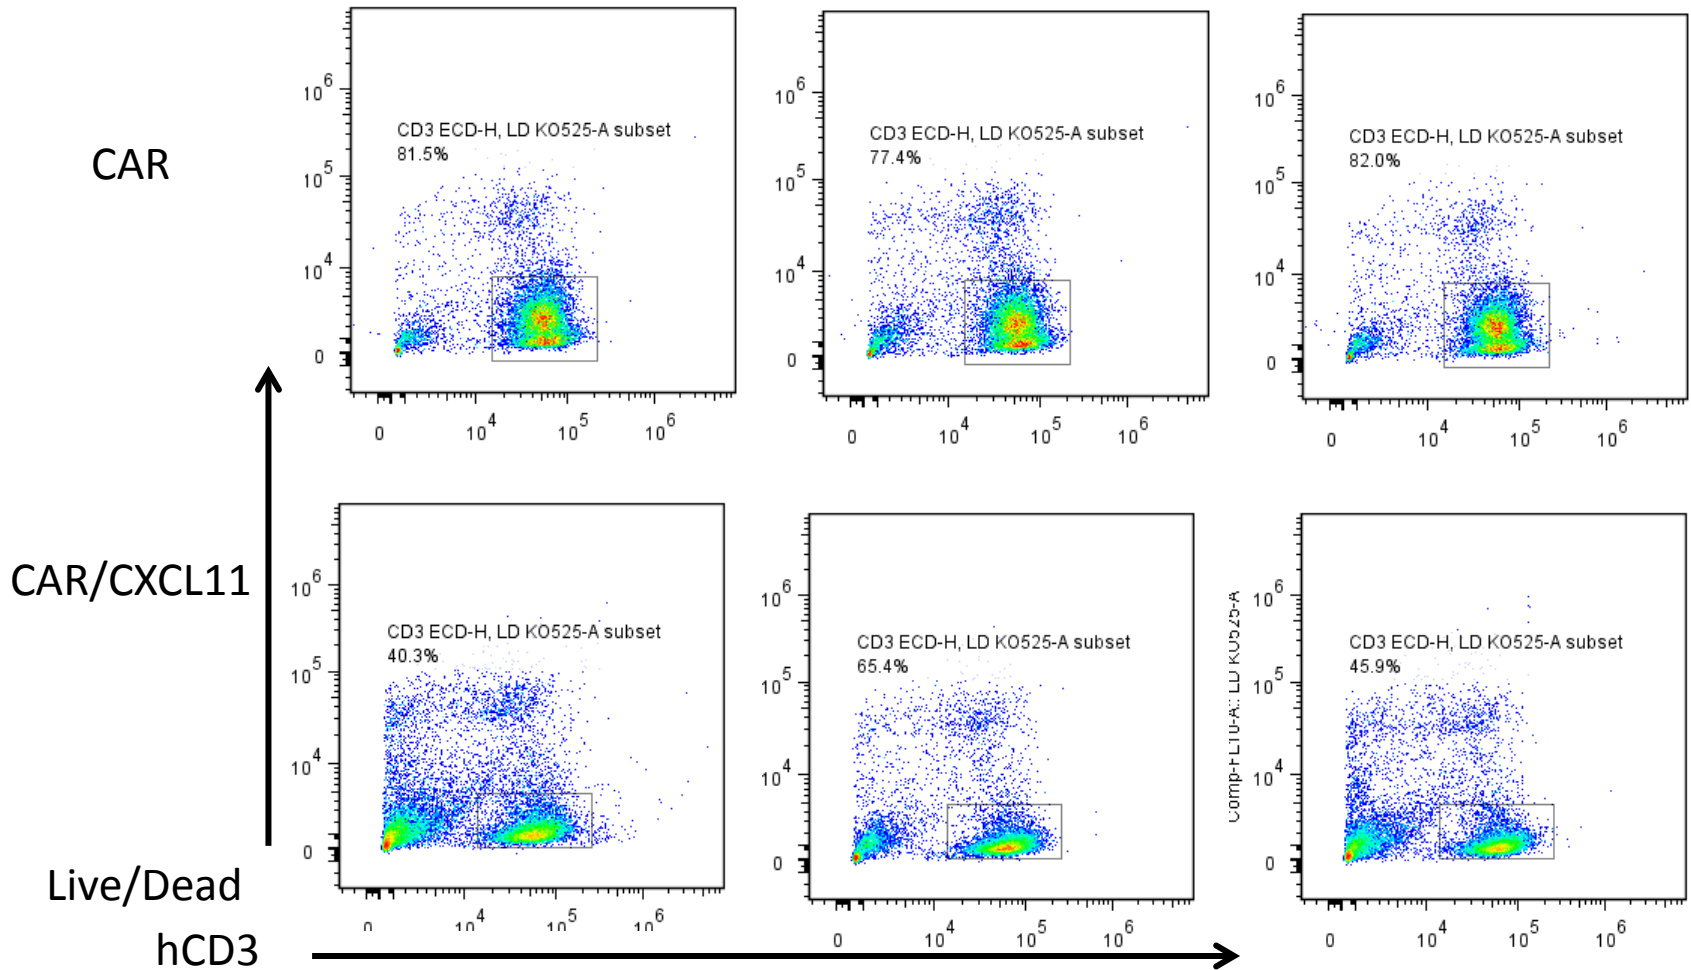



Suppl. Fig 4 Characteristics of VV.CXCL11 virus

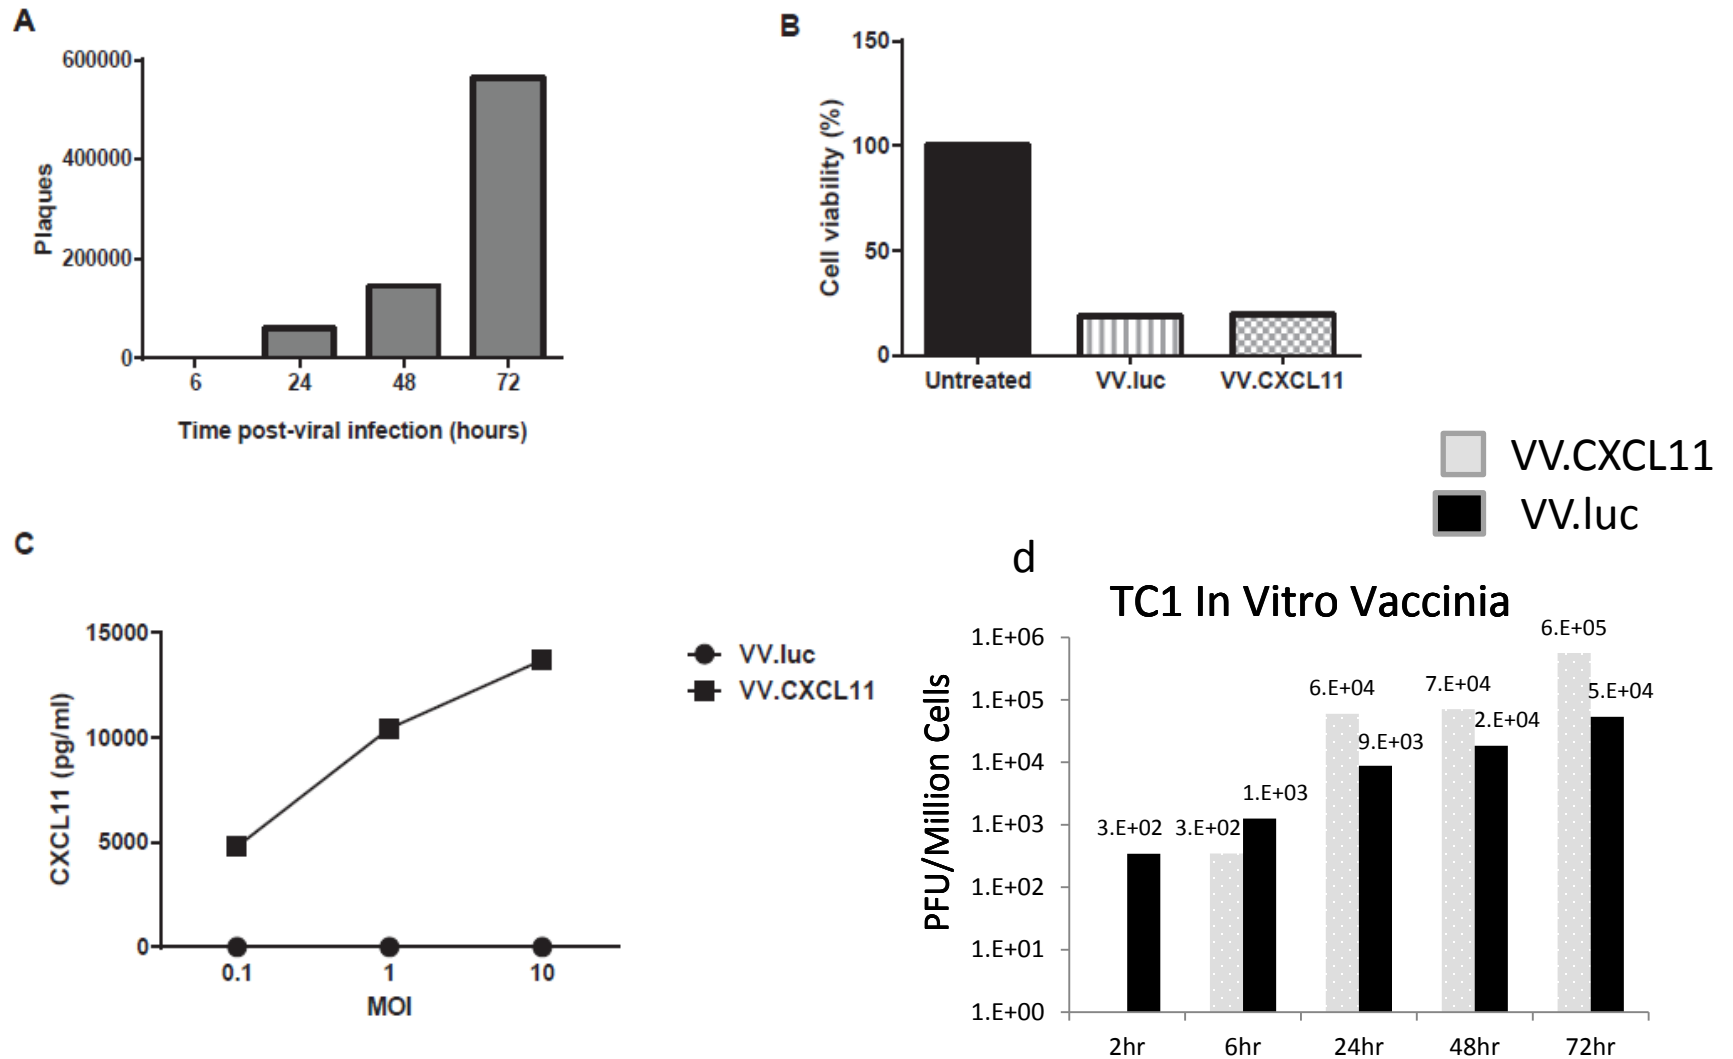

Supplemental Figure 5. Induction of intratumoral E7 tetramers by viruses alone

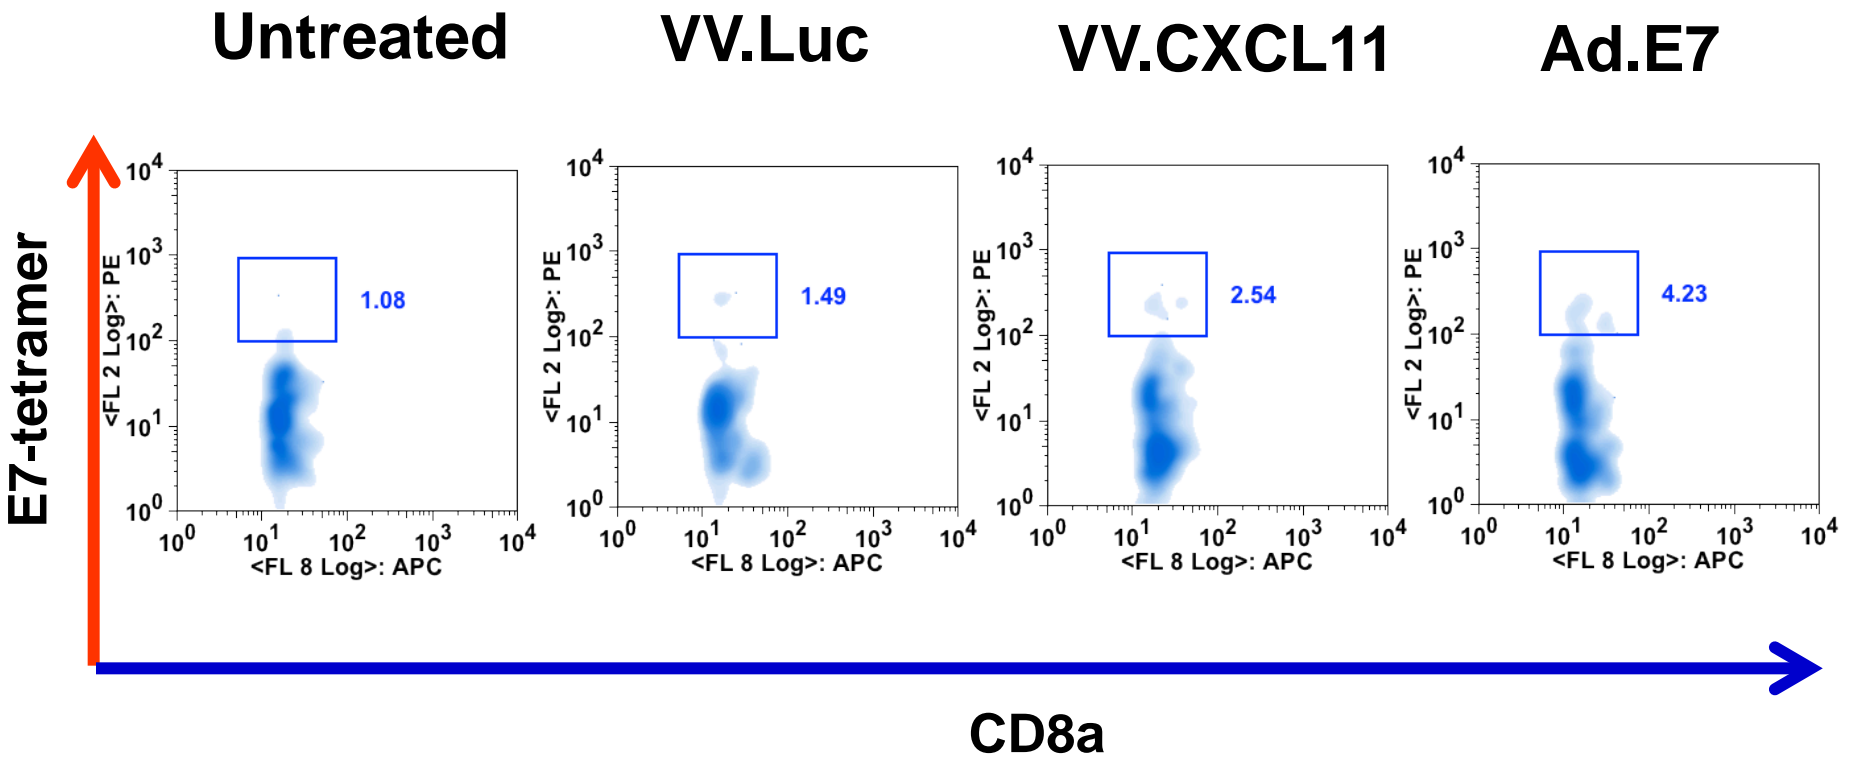

Supplement: koni-07-03-1395997-s001.pdf [file koni-07-03-1395997-s001.pdf]
